# Supplementary material
Source: PubMed Central journal article supplement (PMC6159596)
Supplement: tpmd180417.SD1.pdf [file tpmd180417.SD1.pdf]

**Table S1. Summary statistics of microscopy-based diagnosis in relation to the gold-standard molecular diagnosis.** PPV: positive predictive value; NPV: negative predictive value.

| <b>Species</b> | <b>Sensitivity</b> | <b>Specificity</b>         | <b>PPV</b>        | <b>NPV</b>        |
|----------------|--------------------|----------------------------|-------------------|-------------------|
|                | <b>% (95% CI)</b>  | <b>% (95% CI)</b>          | <b>% (95% CI)</b> | <b>% (95% CI)</b> |
| <i>Pf</i>      | 25 (18-33)         | 99 (99-100)                | 77 (62-88)        | 95 (94-96)        |
| <i>Pv</i>      | 1 (0-5)            | 100 (100-100) <sup>a</sup> | 100 (16-100)      | 93 (92-94)        |

<sup>a</sup> There were zero instances of microscopy positive *P. vivax* diagnoses which were negative by molecular diagnosis.

**Table S2. Association of infection outcomes according to household infection status, with odds ratios (OR) of infection prevalence by household type compared to the background population infection prevalence.** Outcomes are presented as N individuals and % prevalence in italics. Panel A summarises outcomes associated with cohabiting with RDT positive individuals, Panel B, *P. falciparum* positive individuals (by PCR diagnosis), Panel C for *P. vivax* (by PCR diagnosis), and Panel D *P. vivax* infections in Duffy positive and Duffy negative households. Table shading correspond to the different infections: any species (orange), *P. falciparum* (green), and *P. vivax* (blue). The index infected individual(s) in each household is/are excluded from the counts.

| Outcome                    | Outcome           |                   |       | OR    | 95% CI      | p-value |
|----------------------------|-------------------|-------------------|-------|-------|-------------|---------|
|                            | RDT pos           | RDT neg           | TOTAL |       |             |         |
| Whole pop                  | 85 <i>4%</i>      | 1978 <i>96%</i>   | 2063  |       | Reference   |         |
| Cohabiting with ≥1 RDT pos | 19 <i>0%</i>      | 326 <i>94%</i>    | 345   | 1.356 | (0.81-2.26) | 0.2408  |
| Cohabiting with ≥2 RDT pos | 6 <i>11%</i>      | 47 <i>89%</i>     | 53    | 2.97  | (1.24-7.14) | 0.0107  |
| Outcome                    | PCR pos           | PCR neg           | TOTAL | OR    | 95% CI      | p-value |
| Whole pop                  | 284 <i>14%</i>    | 1779 <i>86%</i>   | 2063  |       | Reference   |         |
| Cohabiting with ≥1 RDT pos | 71 <i>21%</i>     | 274 <i>79%</i>    | 345   | 1.62  | (1.22-2.17) | 0.0010  |
| Cohabiting with ≥2 RDT pos | 66 <i>20%</i>     | 266 <i>80%</i>    | 332   | 1.55  | (1.15-2.09) | 0.0034  |
| Outcome                    | <i>Pf</i> PCR pos | <i>Pf</i> PCR neg | TOTAL | OR    | 95% CI      | p-value |
| Whole pop                  | 145 <i>7%</i>     | 1918 <i>93%</i>   | 2063  |       | Reference   |         |
| Cohabiting with ≥1 RDT pos | 45 <i>13%</i>     | 300 <i>87%</i>    | 345   | 1.98  | (1.39-2.83) | 0.0001  |
| Cohabiting with ≥2 RDT pos | 41 <i>12%</i>     | 291 <i>89%</i>    | 332   | 1.86  | (1.29-2.69) | 0.0008  |
| Outcome                    | <i>Pv</i> PCR pos | <i>Pv</i> PCR neg | TOTAL | OR    | 95% CI      | p-value |
| Whole pop                  | 137 <i>7%</i>     | 1926 <i>93%</i>   | 2063  |       | Reference   |         |
| Cohabiting with ≥1 RDT pos | 27 <i>8%</i>      | 318 <i>92%</i>    | 345   | 1.19  | (0.78-1.83) | 0.4190  |
| Cohabiting with ≥2 RDT pos | 26 <i>8%</i>      | 306 <i>92%</i>    | 332   | 1.19  | (0.77-1.85) | 0.4240  |

  

| Outcome                              | Outcome           |                   |       | OR   | 95% CI      | p-value |
|--------------------------------------|-------------------|-------------------|-------|------|-------------|---------|
|                                      | PCR pos           | PCR neg           | TOTAL |      |             |         |
| Whole pop                            | 284 <i>14%</i>    | 1779 <i>86%</i>   | 2063  |      | Reference   |         |
| Cohabiting with ≥1 <i>Pf</i> PCR pos | 105 <i>22%</i>    | 362 <i>77%</i>    | 467   | 1.82 | (1.41-2.33) | <0.0001 |
| Cohabiting with ≥2 <i>Pf</i> PCR pos | 41 <i>26%</i>     | 118 <i>74%</i>    | 159   | 2.18 | (1.49-3.17) | <0.0001 |
| Outcome                              | <i>Pf</i> PCR pos | <i>Pf</i> PCR neg | TOTAL | OR   | 95% CI      | p-value |
| Whole pop                            | 145 <i>7%</i>     | 1918 <i>93%</i>   | 2063  |      | Reference   |         |
| Cohabiting with ≥1 <i>Pf</i> PCR pos | 47 <i>10%</i>     | 420 <i>90%</i>    | 467   | 1.48 | (1.05-2.09) | 0.0253  |
| Cohabiting with ≥2 <i>Pf</i> PCR pos | 18 <i>11%</i>     | 141 <i>89%</i>    | 159   | 1.69 | (1.01-2.84) | 0.0455  |
| Outcome                              | <i>Pv</i> PCR pos | <i>Pv</i> PCR neg | TOTAL | OR   | 95% CI      | p-value |
| Whole pop                            | 137 <i>7%</i>     | 1926 <i>93%</i>   | 2063  |      | Reference   |         |
| Cohabiting with ≥1 <i>Pf</i> PCR pos | 54 <i>12%</i>     | 413 <i>88%</i>    | 467   | 1.84 | (1.32-2.56) | 0.0003  |
| Cohabiting with ≥2 <i>Pf</i> PCR pos | 20 <i>13%</i>     | 139 <i>87%</i>    | 159   | 2.02 | (1.23-3.33) | 0.0049  |

  

| Outcome                              | Outcome           |                   |       | OR   | 95% CI      | p-value |
|--------------------------------------|-------------------|-------------------|-------|------|-------------|---------|
|                                      | PCR pos           | PCR neg           | TOTAL |      |             |         |
| Whole pop                            | 284 <i>14%</i>    | 1779 <i>86%</i>   | 2063  |      | Reference   |         |
| Cohabiting with ≥1 <i>Pv</i> PCR pos | 97 <i>23%</i>     | 326 <i>77%</i>    | 423   | 1.86 | (1.44-2.41) | <0.0001 |
| Cohabiting with ≥2 <i>Pv</i> PCR pos | 32 <i>23%</i>     | 94 <i>74%</i>     | 126   | 2.13 | (1.40-3.25) | 0.0003  |
| Outcome                              | <i>Pf</i> PCR pos | <i>Pf</i> PCR neg | TOTAL | OR   | 95% CI      | p-value |
| Whole pop                            | 145 <i>7%</i>     | 1918 <i>93%</i>   | 2063  |      | Reference   |         |
| Cohabiting with ≥1 <i>Pv</i> PCR pos | 50 <i>12%</i>     | 373 <i>89%</i>    | 423   | 1.77 | (1.26-2.49) | 0.0008  |
| Cohabiting with ≥2 <i>Pv</i> PCR pos | 12 <i>10%</i>     | 114 <i>90%</i>    | 126   | 1.39 | (0.75-2.58) | 0.2920  |
| Outcome                              | <i>Pv</i> PCR pos | <i>Pv</i> PCR neg | TOTAL | OR   | 95% CI      | p-value |
| Whole pop                            | 137 <i>7%</i>     | 1926 <i>93%</i>   | 2063  |      | Reference   |         |
| Cohabiting with ≥1 <i>Pv</i> PCR pos | 49 <i>12%</i>     | 374 <i>89%</i>    | 423   | 1.84 | (1.31-2.60) | 0.0004  |
| Cohabiting with ≥2 <i>Pv</i> PCR pos | 20 <i>16%</i>     | 106 <i>84%</i>    | 126   | 2.65 | (1.60-4.41) | 0.0001  |

  

| Outcome                              | Outcome           |                   |       | OR   | 95% CI       | p-value |
|--------------------------------------|-------------------|-------------------|-------|------|--------------|---------|
|                                      | <i>Pv</i> PCR pos | <i>Pv</i> PCR neg | TOTAL |      |              |         |
| Whole pop                            | 23 <i>3%</i>      | 472 <i>93%</i>    | 495   |      | Reference    |         |
| Cohabiting with ≥1 <i>Pv</i> PCR pos | 5 <i>6%</i>       | 82 <i>94%</i>     | 87    | 1.25 | (0.46-3.38)  | 0.6582  |
| Cohabiting with ≥2 <i>Pv</i> PCR pos | 2 <i>25%</i>      | 6 <i>73%</i>      | 8     | 6.84 | (1.31-35.77) | 0.0086  |
| Outcome                              | <i>Pv</i> PCR pos | <i>Pv</i> PCR neg | TOTAL | OR   | 95% CI       | p-value |
| Whole pop                            | 107 <i>8%</i>     | 1266 <i>92%</i>   | 1373  |      | Reference    |         |
| Cohabiting with ≥1 <i>Pv</i> PCR pos | 39 <i>13%</i>     | 262 <i>87%</i>    | 301   | 1.76 | (1.19-2.60)  | 0.0040  |
| Cohabiting with ≥2 <i>Pv</i> PCR pos | 15 <i>15%</i>     | 88 <i>85%</i>     | 103   | 2.02 | (1.13-3.61)  | 0.0161  |

**Table S3. *P. falciparum* infection among Duffy positive and negative hosts, as detected by molecular diagnosis.** Odds ratios by unconditional maximum likelihood estimation (Wald).

|                  | N   | <i>P. falciparum</i> infection |           | Odds Ratio<br>(95% CI) | Chi-Sq<br>p-value |
|------------------|-----|--------------------------------|-----------|------------------------|-------------------|
|                  |     | Negative                       | Positive  |                        |                   |
| <i>Phenotype</i> |     |                                |           |                        |                   |
| Duffy positive   | 964 | 894 (92.7%)                    | 70 (7.3%) | <i>Reference</i>       |                   |
| Duffy negative   | 914 | 855 (93.5%)                    | 59 (6.5%) | 0.88 (0.62-1.26)       | 0.490             |
| <i>Genotype</i>  |     |                                |           |                        |                   |
| (+/+)            | 246 | 224 (91.1%)                    | 22 (8.9%) | <i>Reference</i>       |                   |
| (+/-)            | 718 | 670 (93.3%)                    | 48 (6.7%) | 0.73 (0.43-1.24)       | 0.239             |
| (-/-)            | 914 | 855 (93.5%)                    | 59 (6.5%) | 0.70 (0.42-1.17)       | 0.174             |
