# Supplementary material
Source: PubMed Central journal article supplement (PMC6159596)

## Supplemental file 1: Supplementary figures

### Risk factors for malaria in central Madagascar: insights from a cross-sectional population survey

**Figure S1. Monthly suspected malaria fevers tested by RDT, and RDT-confirmed infections reported from local health clinics to the Tsiroanomandidy district health office (2010-2014). The screening survey month (March 2014) is highlighted in green. Data are from the routine Health Management Information System of the Ministry of Health, Madagascar.**

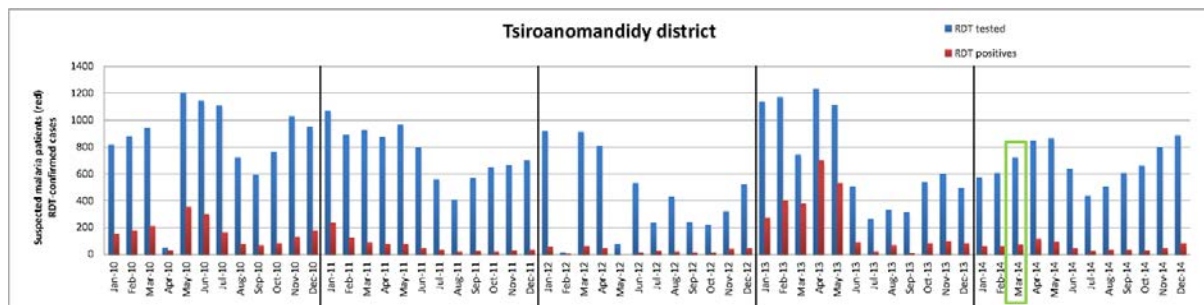

**Figure S2. Distribution of infections by age (A-B) and exposure time (C-D) to transmission.** Infections are represented in colour, while non-infected are grey in the plots. Panels A and C summarise total counts by age or exposure class, and panels B and D plot the proportions infected within each age or exposure class.

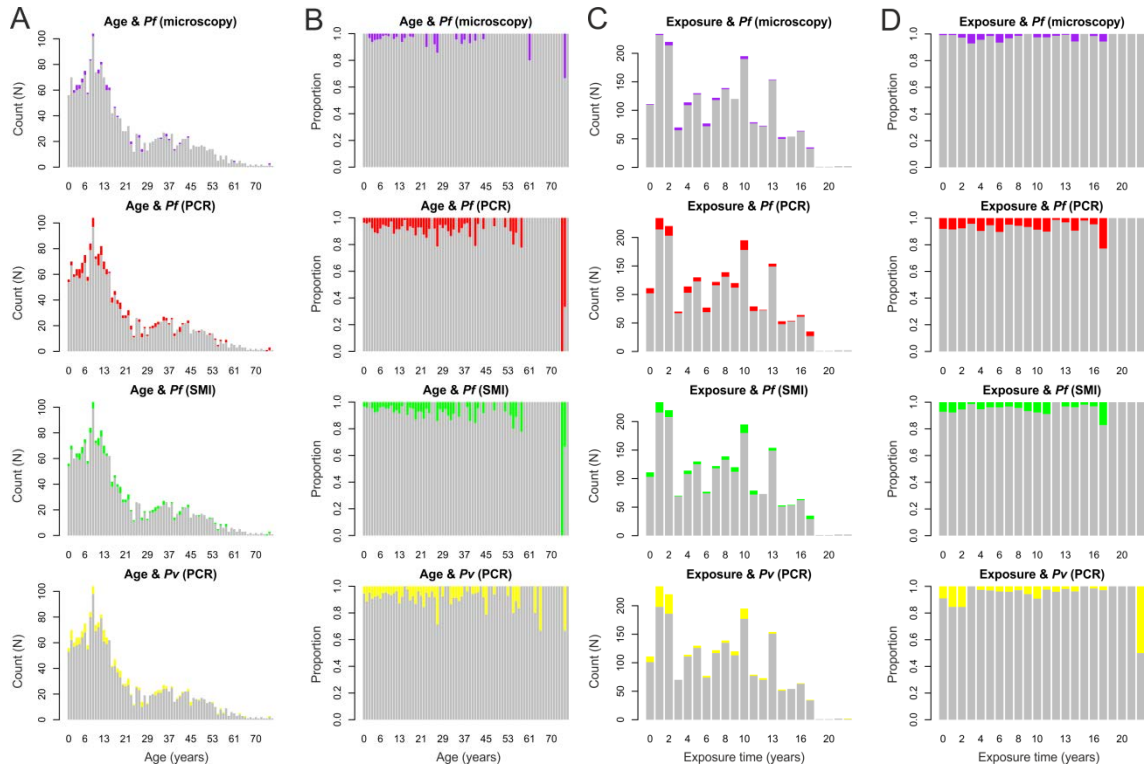

Supplement: tpmd180417.SD2.pdf [file tpmd180417.SD2.pdf]
